# Supplementary material
Source: publisher figshare collection journal article supplement (https://sage.figshare.com/ndownloader/files/15654002)
Supplement: Supplementary file [file 15654002]

**Food safety and nutrition for low-income urbanites:  
exploring a social justice dilemma in consumption policy**

**Supplementary information**

**S1: SAMPLING PLAN**

The following sampling strategy was the basis for (i) the household survey, (ii) the nutrition survey and 24-hour diet recall, and (iii) the qualitative research. The strategy was divided into five steps, of which steps 1 to 3 were completed before the start of the survey fieldwork, while steps 4 and 5 were addressed during the field research.

**STEP 1: POVERTY DEFINITION**

In this research a cut-off point for poverty of US\$ 5/person/day was used. This built on the Vietnam Household Income Band (HIB),<sup>(1)</sup> which follows the income classifications used by the Vietnam General Statistics Office.<sup>(2)</sup> These classifications are well understood by the local population and were used in previous research.<sup>(3)</sup> For discussing the bottom of the pyramid, internationally different cut-off points are used (from US\$ 1.25/person/day [World Bank] to up to US\$ 8/person/day.<sup>(4)</sup> The World Bank definition of poverty at US\$ 1.25/person/day appears too narrow for an Asian urban context, given the price levels of basic necessities and high inflation rates in Hanoi, as well as the fact that the urban context does not allow for food self-provisioning (like in rural areas).

Aiming to understand the potential impact of food retail on dietary intake through shopping practices, this study included a population with minimum purchasing power, but below the minimum wage. The minimum wage in 2017 in Hanoi was US\$ 5.75/person/day.

Respondent inclusion was based on monthly household income and household size in order to allow inclusion based on per-capita income levels. See the respondent inclusion question in Table 1, which was used in the household survey below:

Table 1

| Q8                                       | A                     | How many persons are living within your household? |          |          |          |          |        |        |        |         |  |
|------------------------------------------|-----------------------|----------------------------------------------------|----------|----------|----------|----------|--------|--------|--------|---------|--|
|                                          |                       | [Single answer]                                    |          |          |          |          |        |        |        |         |  |
|                                          |                       |                                                    | 2 pers   | 3 pers   | 4 pers   | 5 pers   | 6 pers | 7 pers | 8 pers | 9+ pers |  |
| B                                        |                       | Code                                               | 1        | 2        | 3        | 4        | 5      | 6      | 7      | 8       |  |
| What is your household's monthly income? | Less than VND 3 mln   | 1                                                  | Continue |          |          |          |        |        |        |         |  |
|                                          | 3,000,000–4,499,999   | 2                                                  |          |          |          |          |        |        |        |         |  |
|                                          | 4,500,000–5,499,999   | 3                                                  |          |          |          |          |        |        |        |         |  |
|                                          | 5,500,000–6,499,999   | 4                                                  |          |          |          |          |        |        |        |         |  |
|                                          | 6,500,000–7,499,999   | 5                                                  | STOP     | Continue |          |          |        |        |        |         |  |
|                                          | 7,500,000–8,499,999   | 6                                                  | STOP     |          |          |          |        |        |        |         |  |
|                                          | 8,500,000–9,499,999   | 7                                                  | STOP     |          |          |          |        |        |        |         |  |
|                                          | 9,500,000–10,499,999  | 8                                                  | STOP     |          |          |          |        |        |        |         |  |
|                                          | 10,500,000–11,499,999 | 9                                                  | STOP     | STOP     | Continue |          |        |        |        |         |  |
|                                          | 11,500,000–12,499,999 | 10                                                 | STOP     | STOP     |          |          |        |        |        |         |  |
|                                          | 12,500,000–13,499,999 | 11                                                 | STOP     | STOP     |          |          |        |        |        |         |  |
|                                          | 13,500,000–14,999,999 | 12                                                 | STOP     | STOP     | STOP     | Continue |        |        |        |         |  |
|                                          | 15,000,000 and over   | 13                                                 | STOP     |          |          |          |        |        |        |         |  |

## STEP 2: DISTRICT SELECTION

Districts were purposively selected based on the following criteria:

1. Exclusion of recently developed urban areas on the outskirts of urban Hanoi (like Ha Dong)
2. Focus on the more inner urban districts
3. Exclusion of atypical districts: Tay Ho (expatriate community) and Hoan Kiem (tourist area)
4. Final district selection based on:
  - Retail density (supermarket)
  - Information readily available on markets (HealthBridge Livable Cities Project – Preserving Public Markets: <https://healthbridge.ca/projects/entry/livable-cities-vietnam>)
  - Size in square kilometres (feasibility for census)
  - Percentage of the population that was poor according to GSO statistics (although we did not focus on the official poor living below US\$ 1/person/day)

Out of the five relevant urban districts (Table 2), two districts were selected: Dong Da and Ba Dinh.

- Dong Da has the highest population density and the highest number of supermarkets.
- Ba Dinh is a very central district (Old Hanoi), with the highest proportion of poor households.

These districts and others are mapped in Figure 1.

Table 2

| District       | No. of wards | Size (km <sup>2</sup> ) | Population     | Population density (no. of people per km <sup>2</sup> ) | Proportion in extreme poverty (living on less than US\$ 1/person/day) | No. of supermarkets |
|----------------|--------------|-------------------------|----------------|---------------------------------------------------------|-----------------------------------------------------------------------|---------------------|
| <b>Ba Dinh</b> | <b>14</b>    | <b>9.224</b>            | <b>242,800</b> | <b>26,323</b>                                           | <b>0.92%</b>                                                          | <b>10</b>           |
| Cau Giay       | 8            | 12.04                   | 251,800        | 20,914                                                  | 0.12%                                                                 | 10                  |
| <b>Dong Da</b> | <b>21</b>    | <b>9.96</b>             | <b>408,000</b> | <b>40,964</b>                                           | <b>0.55%</b>                                                          | <b>15</b>           |
| Hai Ba Trung   | 20           | 14.6                    | 378000         | 25,890                                                  | 0.66%                                                                 | 9                   |
| Thanh Xuan     | 11           | 9.11                    | 259000         | 28,430                                                  | 0.25%                                                                 | 5                   |

NOTE: Selected districts in bold print.

SOURCES: GSO (2012), *Household Living Standard Survey*, General Statistics Office Of Vietnam; Hanoi Statistics Office (2013), *Statistics of Hanoi Population & Labour*.

Figure 1

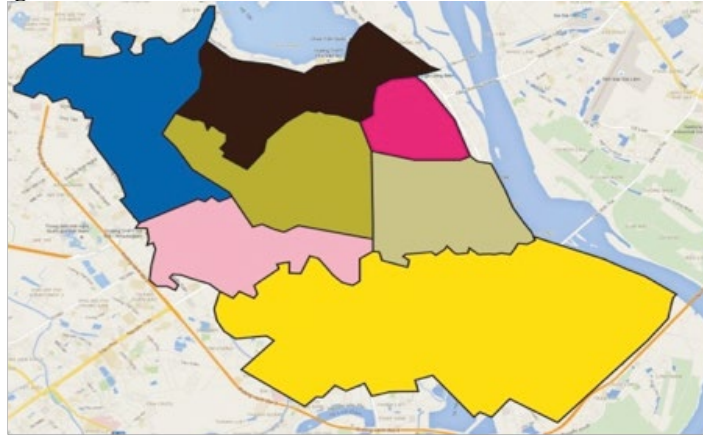

| Urban Hanoi  |            |
|--------------|------------|
| Hoàn Kiếm    | Đống Đa    |
| Ba Đình      | Cầu Giấy   |
| Hai Bà Trưng | Thanh Xuân |
| Hoàng Mai    |            |

### STEP 3: SELECTION OF SAMPLING AREAS

In the districts Dong Da and Ba Dinh, a census of the retail outlets was conducted. The census data provided the basis for the respondent inclusion. Based on the GIS census mapping, concentric circles were drawn around the identified hyper- and supermarkets and formal wet markets to identify areas that fit the four sampling strata, shown in Figure 2 and Table 3 below.

Table 3

| Respondents     | Supermarket within walking distance (300 metres) | Formal wet market within walking distance (300 metres) |
|-----------------|--------------------------------------------------|--------------------------------------------------------|
| Group 1 (N=100) | Yes                                              | Yes                                                    |
| Group 2 (N=100) | Yes                                              | No                                                     |
| Group 3 (N=100) | No                                               | Yes                                                    |
| Group 4 (N=100) | No                                               | No                                                     |

Figure 2

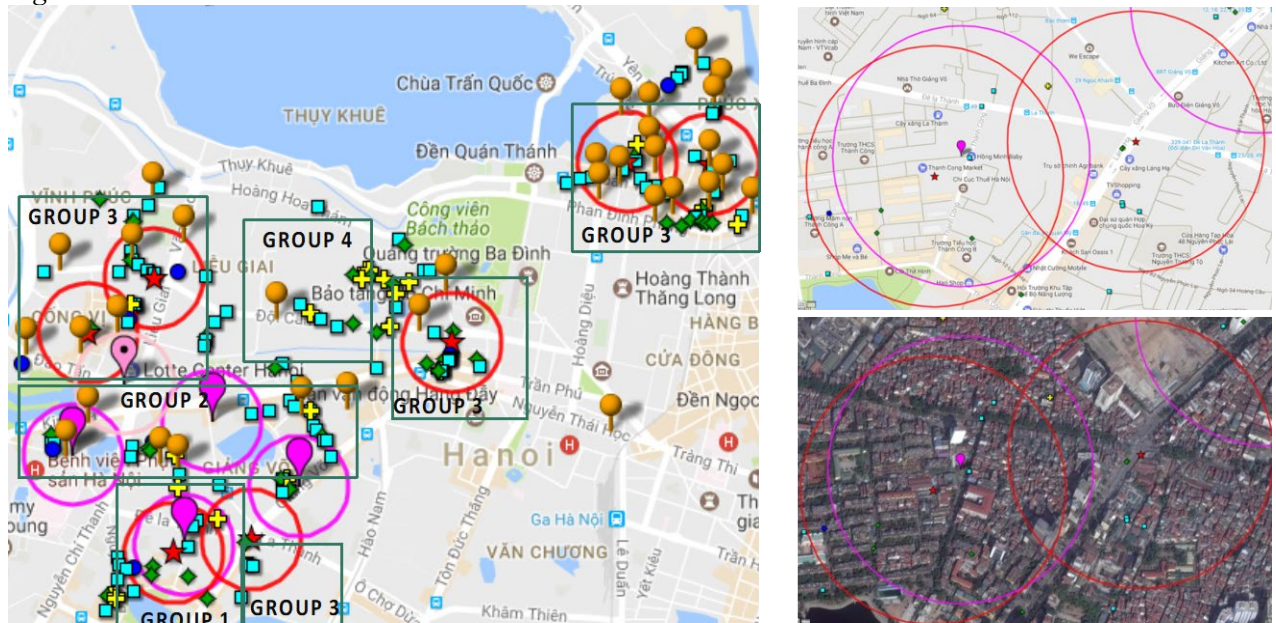

The enumerators were assigned to a specific area. The enumerators were divided over the two districts, but the district was not a variable in our analysis. A balanced distribution between the two districts was preferred, but because the district was not a variable in our data analysis, it was not a serious problem that for practical reasons during the execution, slightly more or fewer households were included per group in one district compared to the other, as long as the total numbers per stratum were met. Table 4 shows the numbers of respondents and presence of markets for the two selected districts.

Table 4

|                | <b>Respondents</b> | <b>Supermarket within walking distance (300 metres)</b> | <b>Formal wetmarket within walking distance (300 metres)</b> |
|----------------|--------------------|---------------------------------------------------------|--------------------------------------------------------------|
| <b>Ba Dinh</b> | Group 1 (N=50)     | Yes                                                     | Yes                                                          |
|                | Group 2 (N=50)     | Yes                                                     | No                                                           |
|                | Group 3 (N=50)     | No                                                      | Yes                                                          |
|                | Group 4 (N=50)     | No                                                      | No                                                           |
| <b>Dong Da</b> | Group 1 (N=50)     | Yes                                                     | Yes                                                          |
|                | Group 2 (N=50)     | Yes                                                     | No                                                           |
|                | Group 3 (N=50)     | No                                                      | Yes                                                          |
|                | Group 4 (N=50)     | No                                                      | No                                                           |

#### **STEP 4: HOUSEHOLD/RESPONDENT INCLUSION**

The survey was a door-to-door survey in which participants were randomly selected within the aforementioned areas. The enumerator assigned to a specific area randomly selected a street to start the fieldwork, went to a random house or apartment building on the street, and approached respondents with the following strategy:

- No more than three households/apartments were included within the same apartment building.
- Only every third apartment within an apartment building was included.
- Only every third building on the street was included.
- Further participant inclusion criteria were included in the survey questionnaire.

#### **Proceedings in short:**

1. Completed survey: continue to the third next apartment within the building (max. of three apartments per building), or to the third next building.
2. Unqualified survey: continue to the next apartment within the building or to the next building.

## STEP 5: TIME SLOTS

To avoid a bias based on timing of visits during the day, the enumerators operated in three different timeslots (Table 5).

Table 5

| Period    | Timeslot* | Explanation                                                                                                                                                                                                          |
|-----------|-----------|----------------------------------------------------------------------------------------------------------------------------------------------------------------------------------------------------------------------|
| Morning   | 7–11 am   | Previous research has indicated that most people are shopping in the early morning. This timeslot thus risks excluding morning shoppers.                                                                             |
| Afternoon | 2–6 pm    | The afternoon allows for the inclusion of people without a job, who are mostly shopping in the morning and using the cooler evening hours for other activities.                                                      |
| Evening   | 6–10 pm   | <b>PREFERENCE:</b><br>Most people are expected to be at home, and it is further expected that women responsible for household shopping and cooking will have more time available in the evening than during daytime. |

\*Lunch time was excluded

---

<sup>1</sup> Nielsen (2013), *Know Your Consumers Grow Your Business: 2013 Pocket Reference Book Vietnam*; also Nielsen (2014), *Know Act Grow: Driving Smarter Business Decisions in Vietnam*, accessed 10 May 2019 at <http://www.nielsen.com/content/dam/nielsen-global/vn/docs/Reports/2014/Know-Act-Grow-nov-2014.pdf>.

<sup>2</sup> GSO (2010), *Results of the Vietnam Household Living Standard Survey 2010*, General Statistics Office Vietnam, accessed 10 May 2019 at [https://www.gso.gov.vn/default\\_en.aspx?tabid=515&idmid=5&ItemID=12426](https://www.gso.gov.vn/default_en.aspx?tabid=515&idmid=5&ItemID=12426).

<sup>3</sup> Wertheim-Heck, S C O, H T L Anh, H T T My, M Klaver and P T T Huong (2014), *Reaching Lower Income Groups with Safe and Healthy Foods - Mission Possible? Insights into the Consumption of Lower Income Consumers in Urban Hanoi*, Fresh Studio, Hanoi, accessed 1 February 2019 at <http://www.freshstudio.vn/images/media-archive/Publications/2014/20140612%20Reaching%20lower%20income%20groups%20with%20safe%20and%20healthy%20food%20-%20mission%20possible.pdf>.

<sup>4</sup> BoP Innovation Center (2013), *BoP Innovation Cycle: The Process of Innovation to Create Inclusive Business*.
